# Supplementary material for: Whole genome sequencing of coagulase positive staphylococci from a dog-and-owner screening survey
Source: PubMed Central journal article supplement (PMC7799803; doi:10.1371/journal.pone.0245351), 2021-01-11

Figs 3 and 4 were generated from these original PFGE pictures.

The only modifications that occurred was cropping of images to exclude the non-gel background or adjusting contrast of the whole image to make ladders and or bands more visible.

Ladder: lamda ( $\lambda$ ) ladder (CHEF DNA size standard; catalog no. 170-3635; Bio-Rad)

ladder Q13 X Q15 Q19 Q20 Q21 ladder Q23 Q24 Q25 Q26 X Q32 ladder

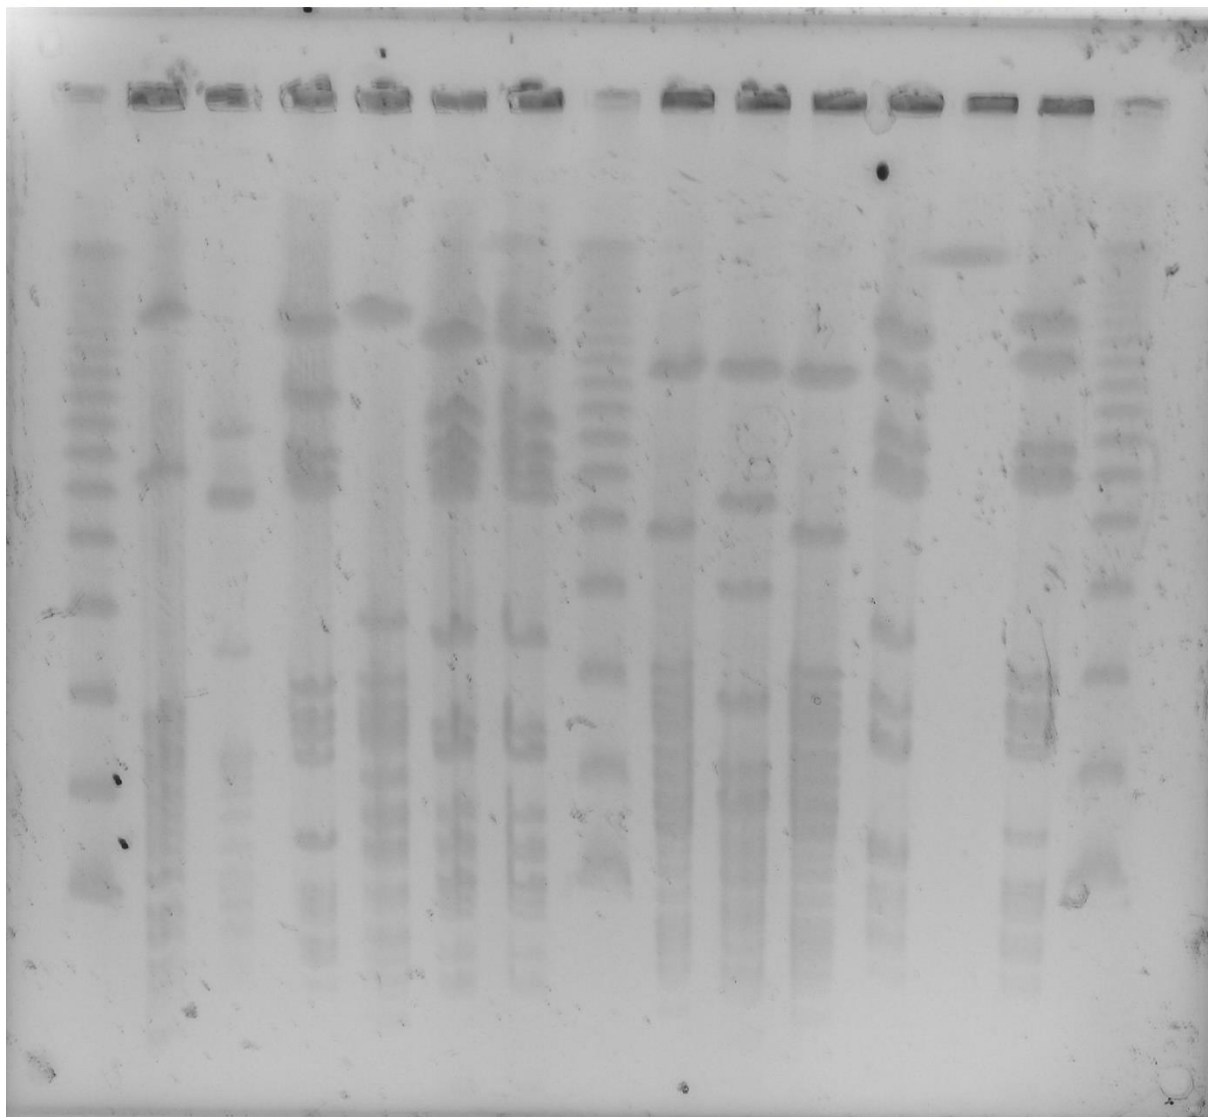

Figs 3 and 4 were generated from these original PFGE pictures.

The only modifications that occurred was cropping of images to exclude the non-gel background or adjusting contrast of the whole image to make ladders and or bands more visible.

Ladder: lamda ( $\lambda$ ) ladder (CHEF DNA size standard; catalog no. 170-3635; Bio-Rad)

ladder x Q34 Q37 Q38 Q40 Q47 ladder x Q52 Q53 Q54 Q56 Q57 ladder

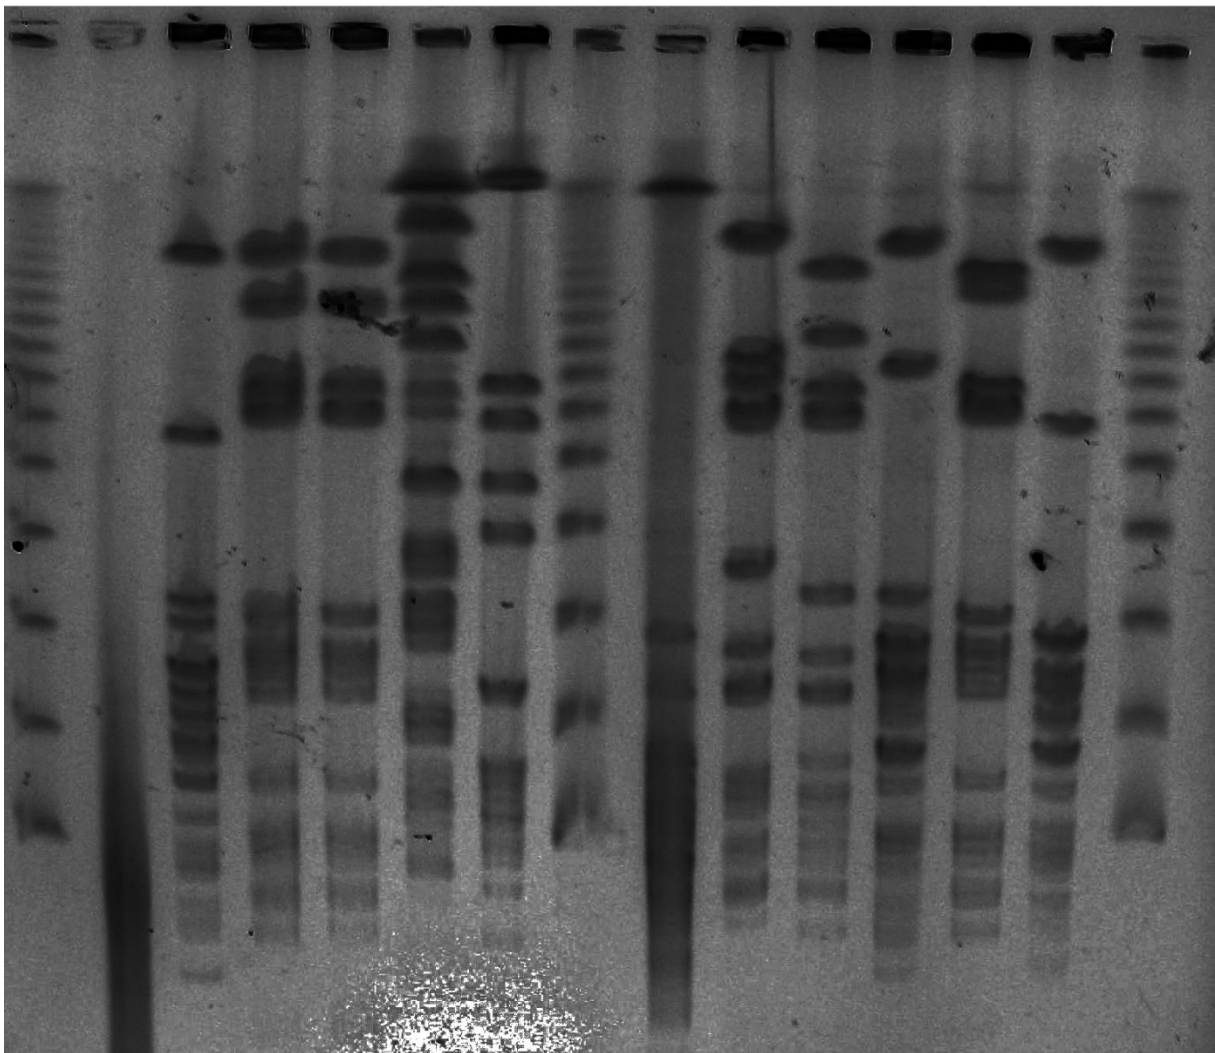

Figs 3 and 4 were generated from these original PFGE pictures.

The only modifications that occurred was cropping of images to exclude the non-gel background or adjusting contrast of the whole image to make ladders and or bands more visible.

Ladder: lamda ( $\lambda$ ) ladder (CHEF DNA size standard; catalog no. 170-3635; Bio-Rad)

ladder Q59 Q60 Q61 Q62 Q63 Q64 ladder Q65 Q66 Q67 X Q69 Q70 ladder

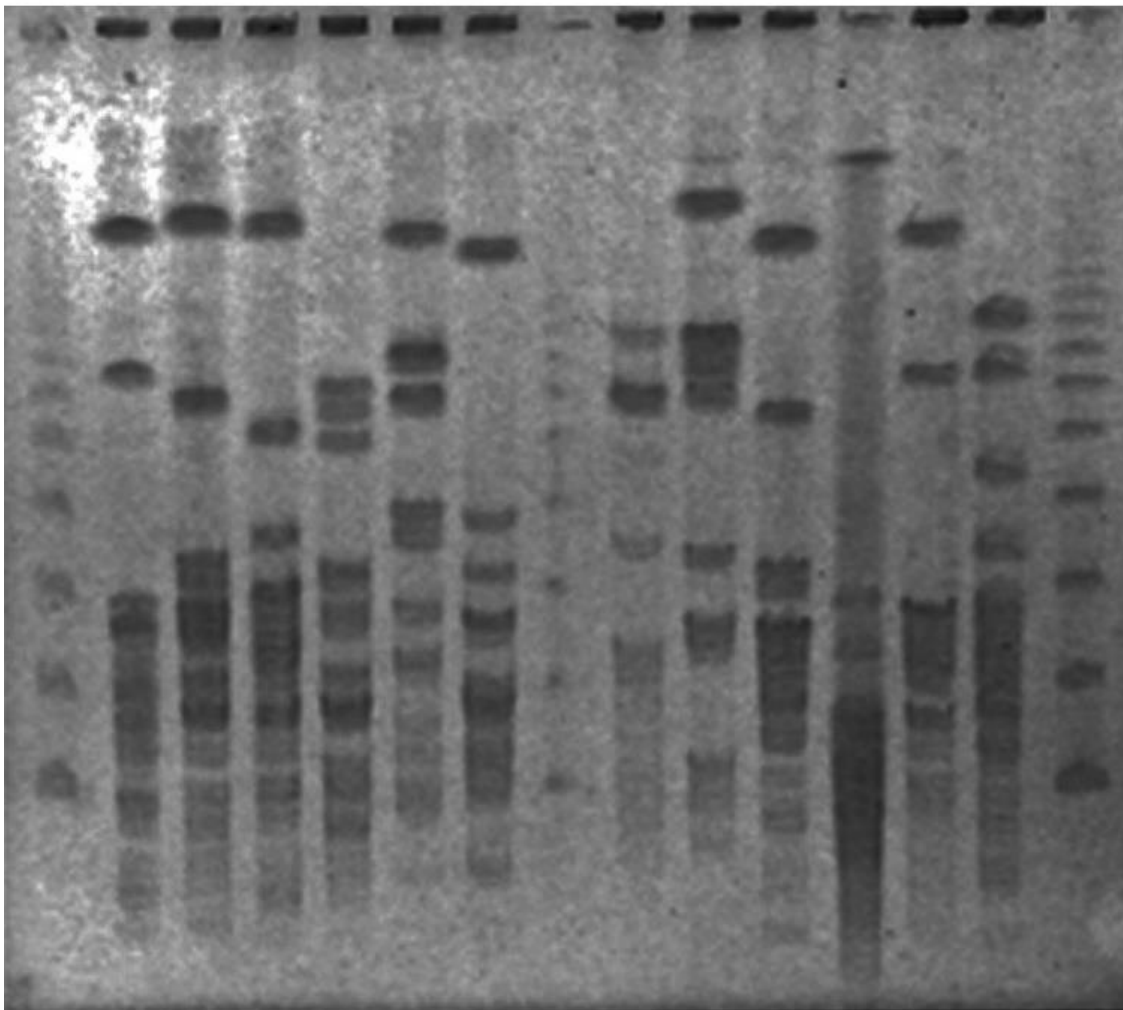

Figs 3 and 4 were generated from these original PFGE pictures.

The only modifications that occurred was cropping of images to exclude the non-gel background or adjusting contrast of the whole image to make ladders and or bands more visible.

Ladder: lamda ( $\lambda$ ) ladder (CHEF DNA size standard; catalog no. 170-3635; Bio-Rad)

ladder Q2 Q4 Q6 Q8 Q9 Q10 ladder Q14 Q30 Q33 Q50 Q59 Q60 ladder

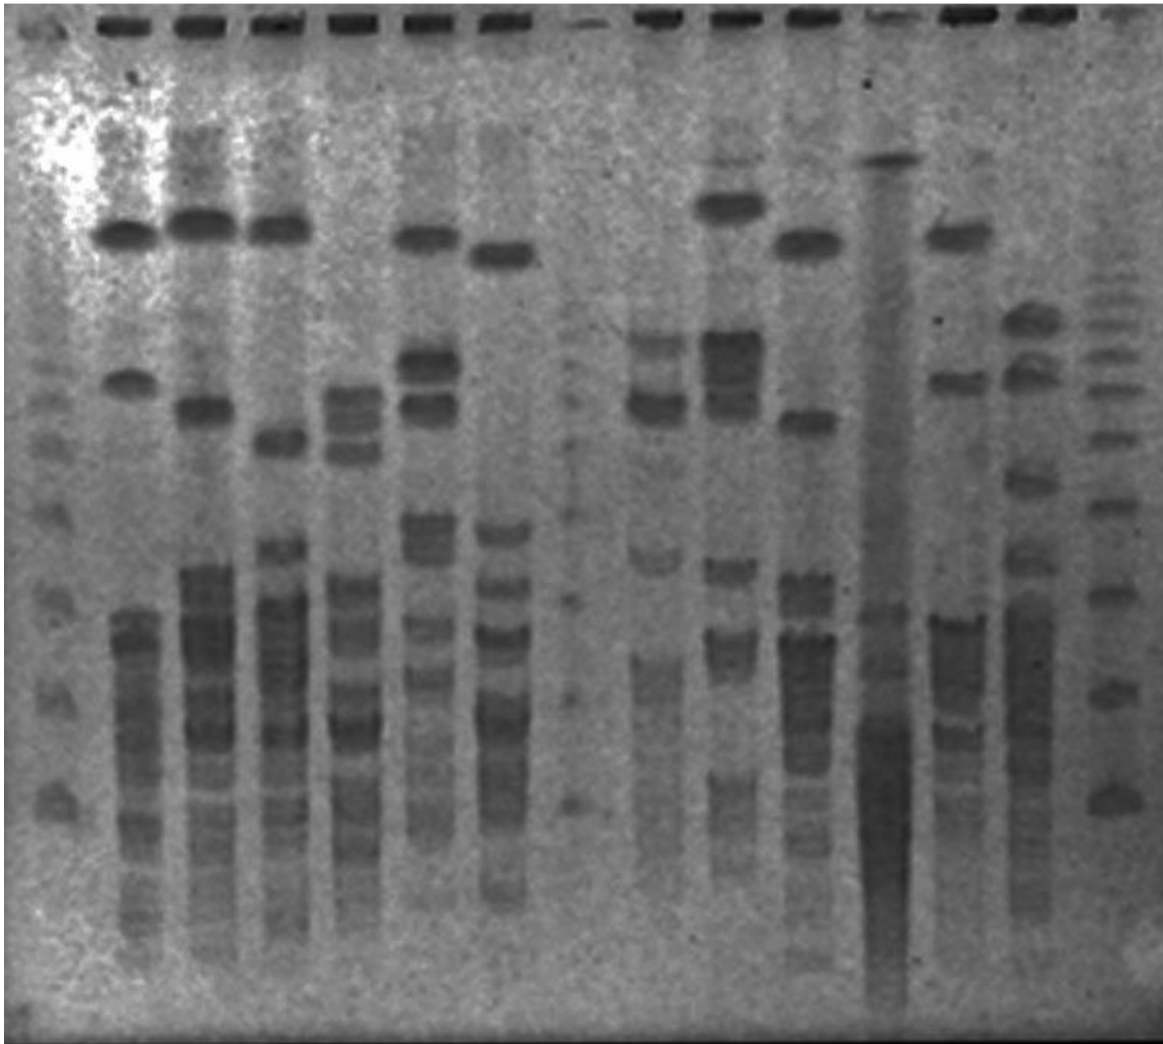

Figs 3 and 4 were generated from these original PFGE pictures.

The only modifications that occurred was cropping of images to exclude the non-gel background or adjusting contrast of the whole image to make ladders and or bands more visible.

Ladder: lamda ( $\lambda$ ) ladder (CHEF DNA size standard; catalog no. 170-3635; Bio-Rad)

ladder Q61 Q62 X Q68 Q71 Q81 ladder Q82 Q83 Q84 Q85 Q86 Q87 ladder

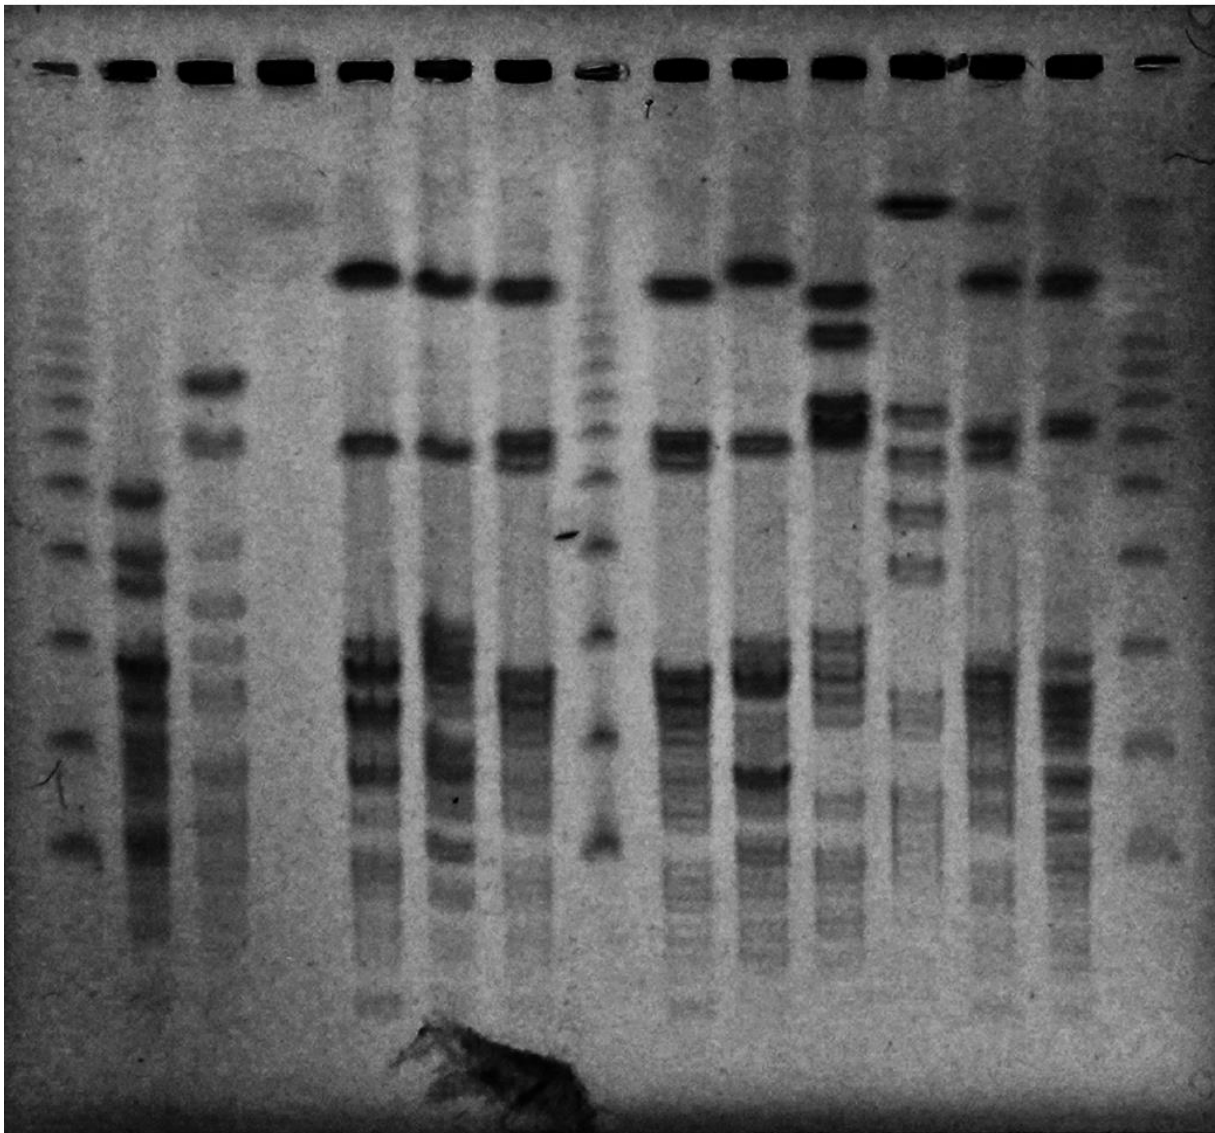

Figs 3 and 4 were generated from these original PFGE pictures.

The only modifications that occurred was cropping of images to exclude the non-gel background or adjusting contrast of the whole image to make ladders and or bands more visible.

Ladder: lamda ( $\lambda$ ) ladder (CHEF DNA size standard; catalog no. 170-3635; Bio-Rad)

ladder X Q72 Q73 Q74 Q75 Q76 ladder Q77 Q78 Q79 Q80 Q16 Q35 ladder

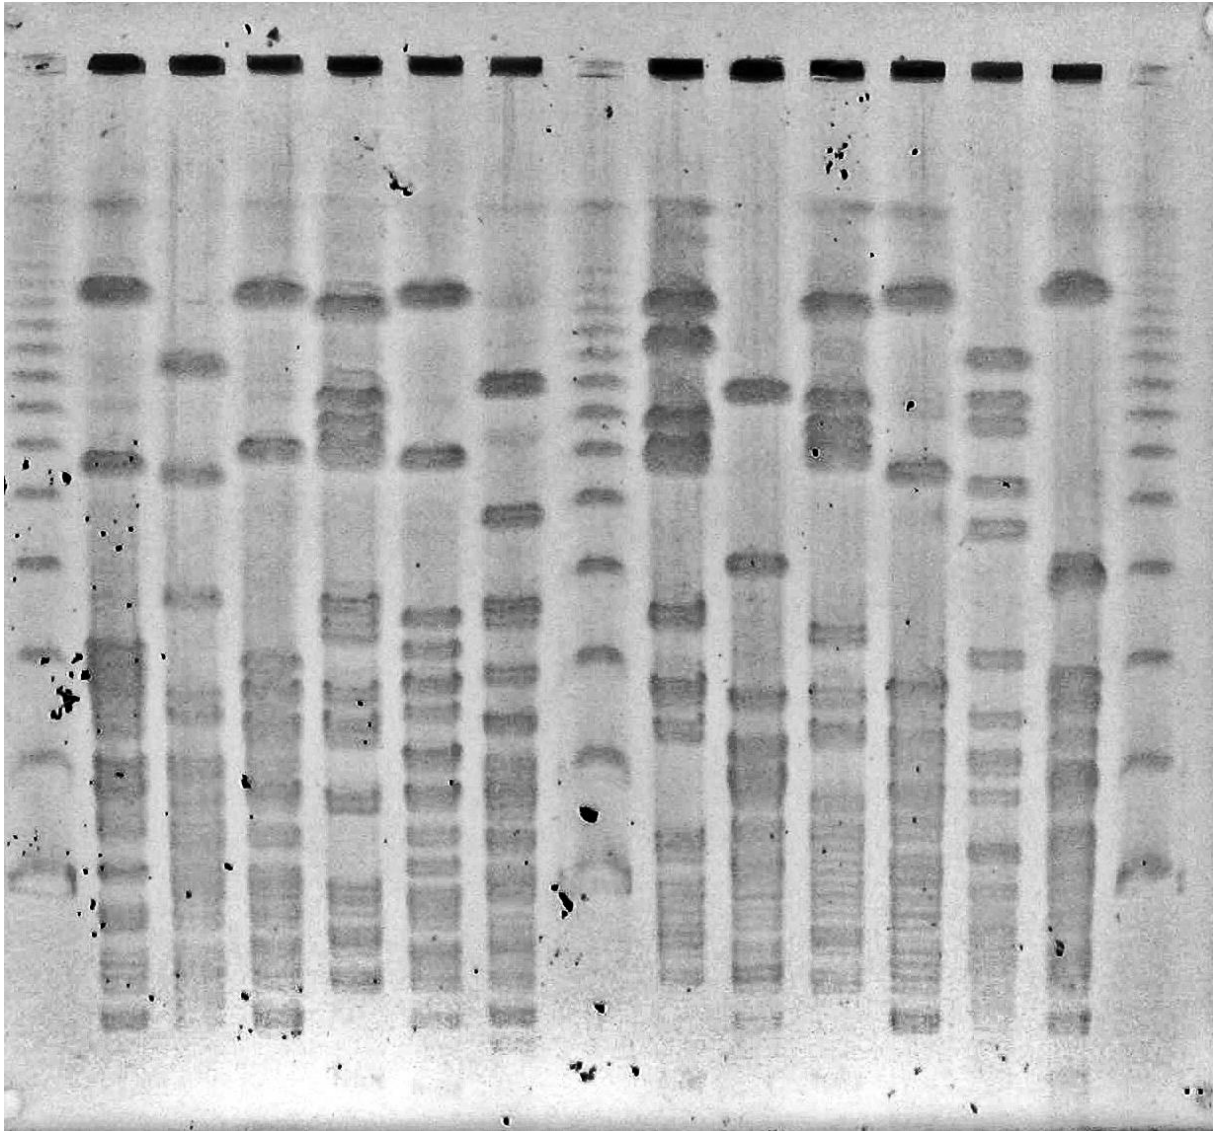

Supplement: pone.0245351.s001.pdf [file pone.0245351.s001.pdf]
